# Supplementary material for: Proregenerative Microenvironment Triggered by Donor Mesenchymal Stem Cells Preserves Renal Function and Structure in Mice with Severe Diabetes Mellitus
Source: Hindawi journal article supplement (doi:10.1155/2015/164703), 2015-01-01

**Supplementary Table 1. RT-PCR specific primers and characteristics of amplicons.**

| Gene                   | N° GenBank access | Sense (5'→3')            | Antisense (5'→3')         | Amplicon  |         |
|------------------------|-------------------|--------------------------|---------------------------|-----------|---------|
|                        |                   |                          |                           | size (bp) | Tm (°C) |
| <i>collagen type I</i> | NM_007742         | AGAACATCACCTATCACTGCAAGA | GTGGTTTTGTATTCGATGACTGTCT | 205       | 89      |
| <i>TGF-beta1</i>       | NM_011577         | TGACGTCACCTGGAGTTGTACGG  | GGTTCATGTCATGGATGGTGC     | 170       | 88      |
| <i>fibronectin</i>     | NM_010233.1       | AGACCATACCTGCCGAATGTAG   | GAGAGTTTCTGTCCTGTAGAG     | 129       | 86      |
| <i>Laminin-beta 1</i>  | NM_008482.2       | AGACCCGAAGAAAAGACAGGC    | CCATAGGGCTAGGACACCAAA     | 124       | 90      |
| <i>bFGF</i>            | NM_008006         | GCGACCCACACGTCAAATA      | TCCATCTTCCTTCATAGCAAGGT   | 101       | 84      |
| <i>EGF</i>             | NM_010113         | TCTCGGATTGACCCAGAT       | CCCAGAACACCTTCCTCTCT      | 192       | 84      |
| <i>HGF</i>             | NM_010427         | AAGCAATCCAGAGGTACGCTAC   | TGCCATCAGGATTGCGGCAATA    | 224       | 87      |
| <i>IL-4</i>            | NM_021283         | ACTTGAGAGAGATCATCGGCA    | AGCTCCATGAGAACACTAGAGTT   | 208       | 86      |
| <i>IL-6</i>            | NM_031168         | ATCCAGTTGCCTTCTTGGGACTGA | TAAGCCTCCGACTTGTGAAGTGGT  | 134       | 86      |
| <i>IL-10</i>           | NM_010548         | AGGGTTACTTGGGTTGCCAA     | CACAGGGGAGAAATCGATGA      | 174       | 87      |
| <i>Nphs</i>            | NM_01945          | CAGCGATGATGCGGAGTACG     | CAGCTACCCAGGTAAGTGTGC     | 149       | 85      |
| <i>GAPDH</i>           | XM_001474390      | ACTCCAACCTCACGGCAAATTC   | TCTCCATGGTGGTGAAGACA      | 171       | 88      |

Supplementary Figure 1

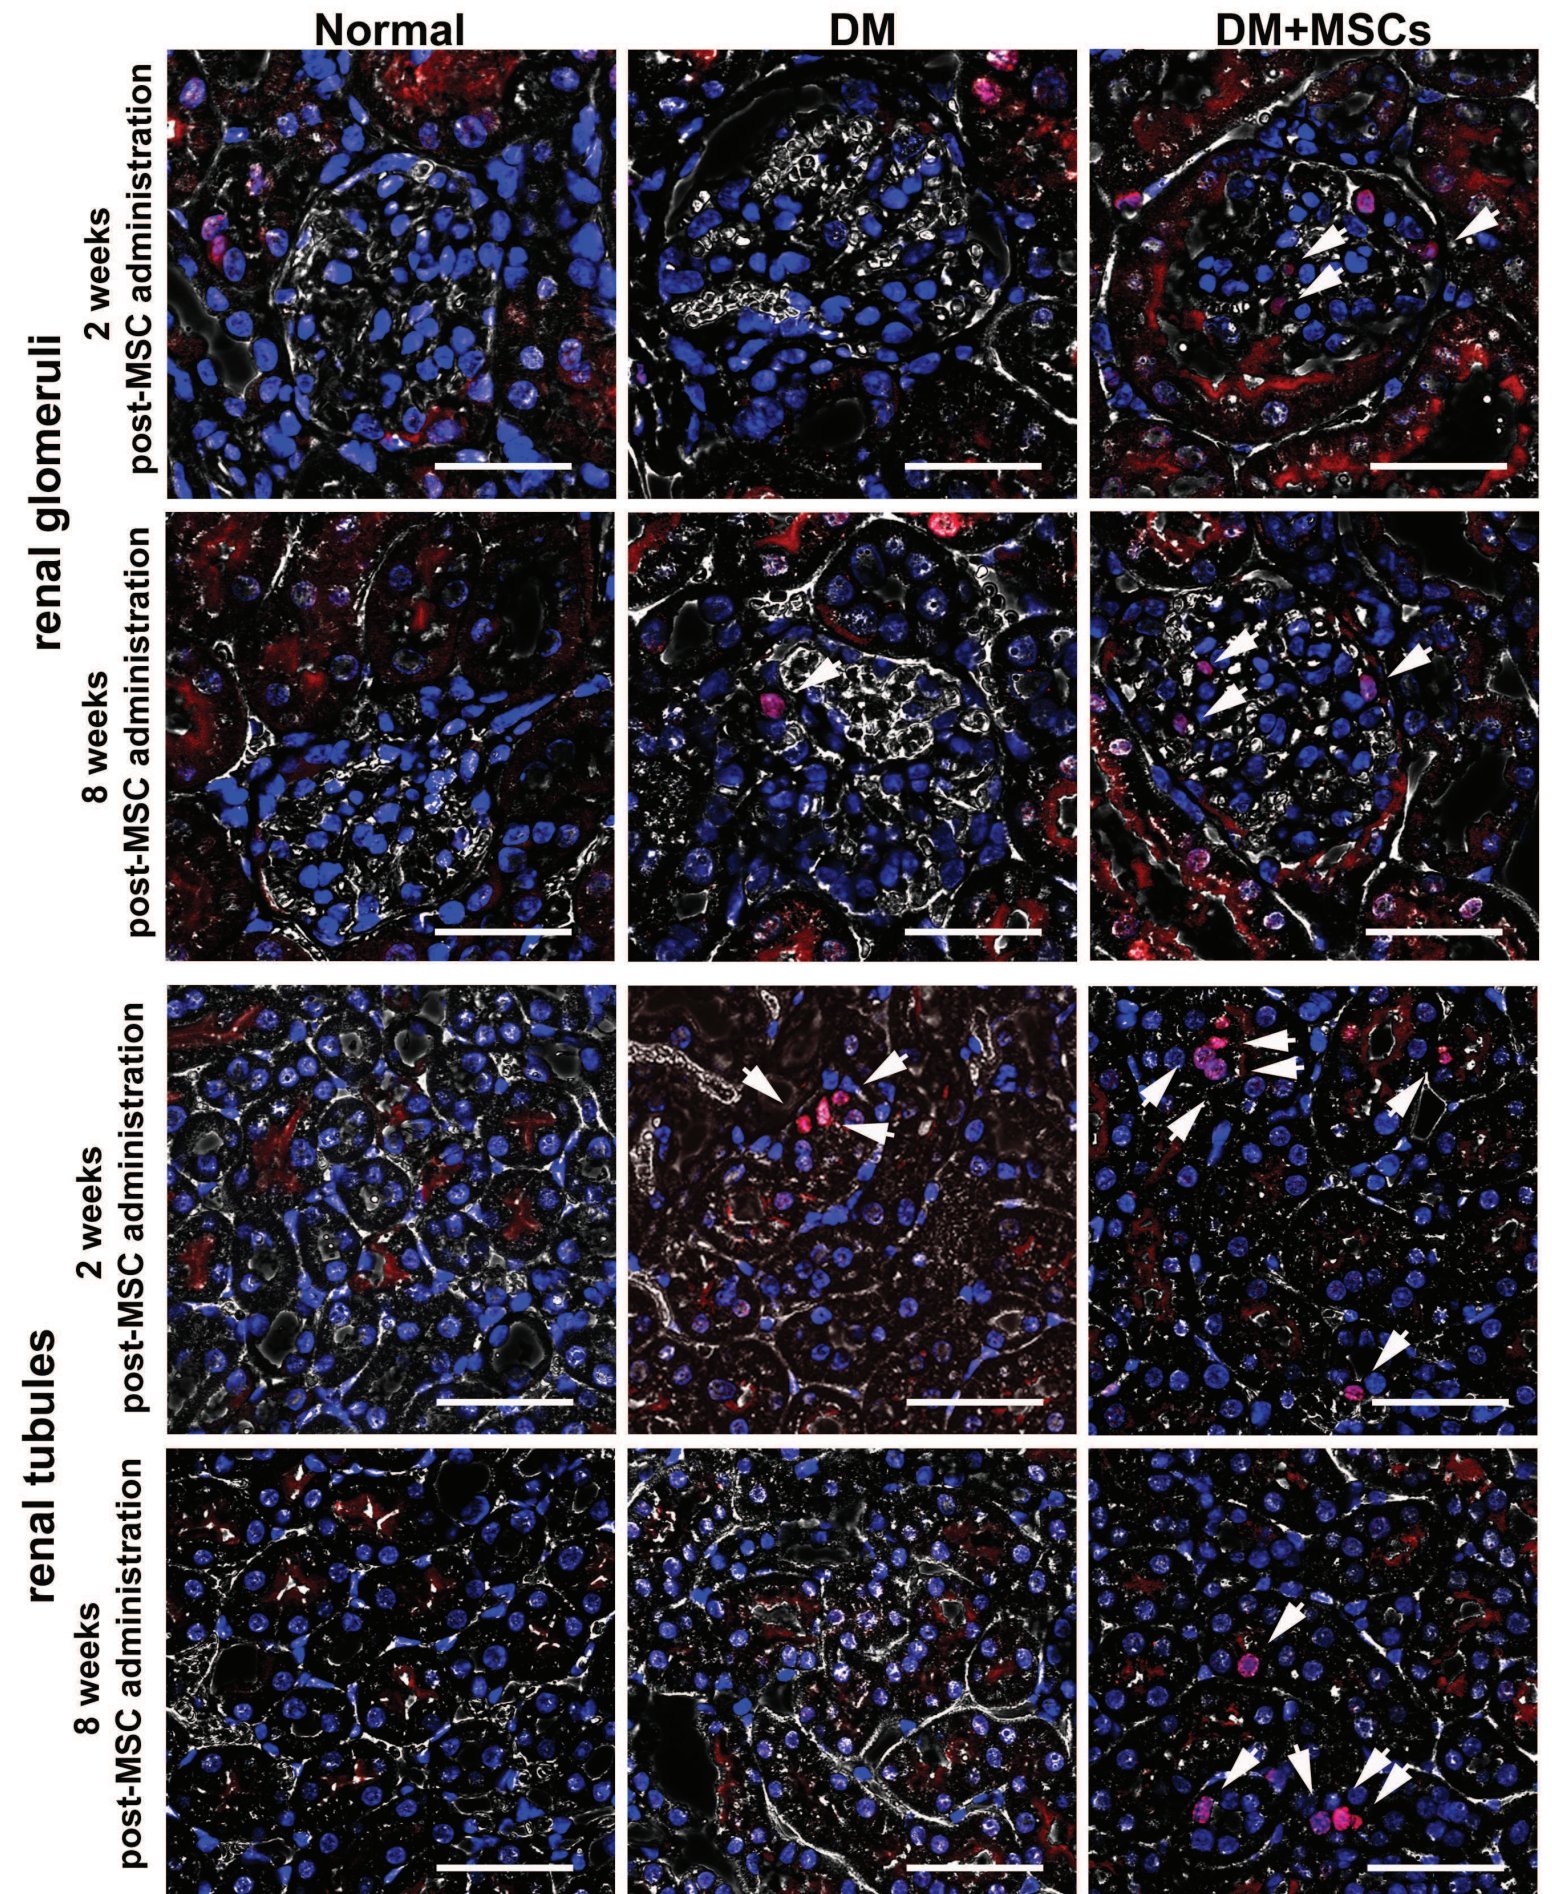

Supplementary Figure 2

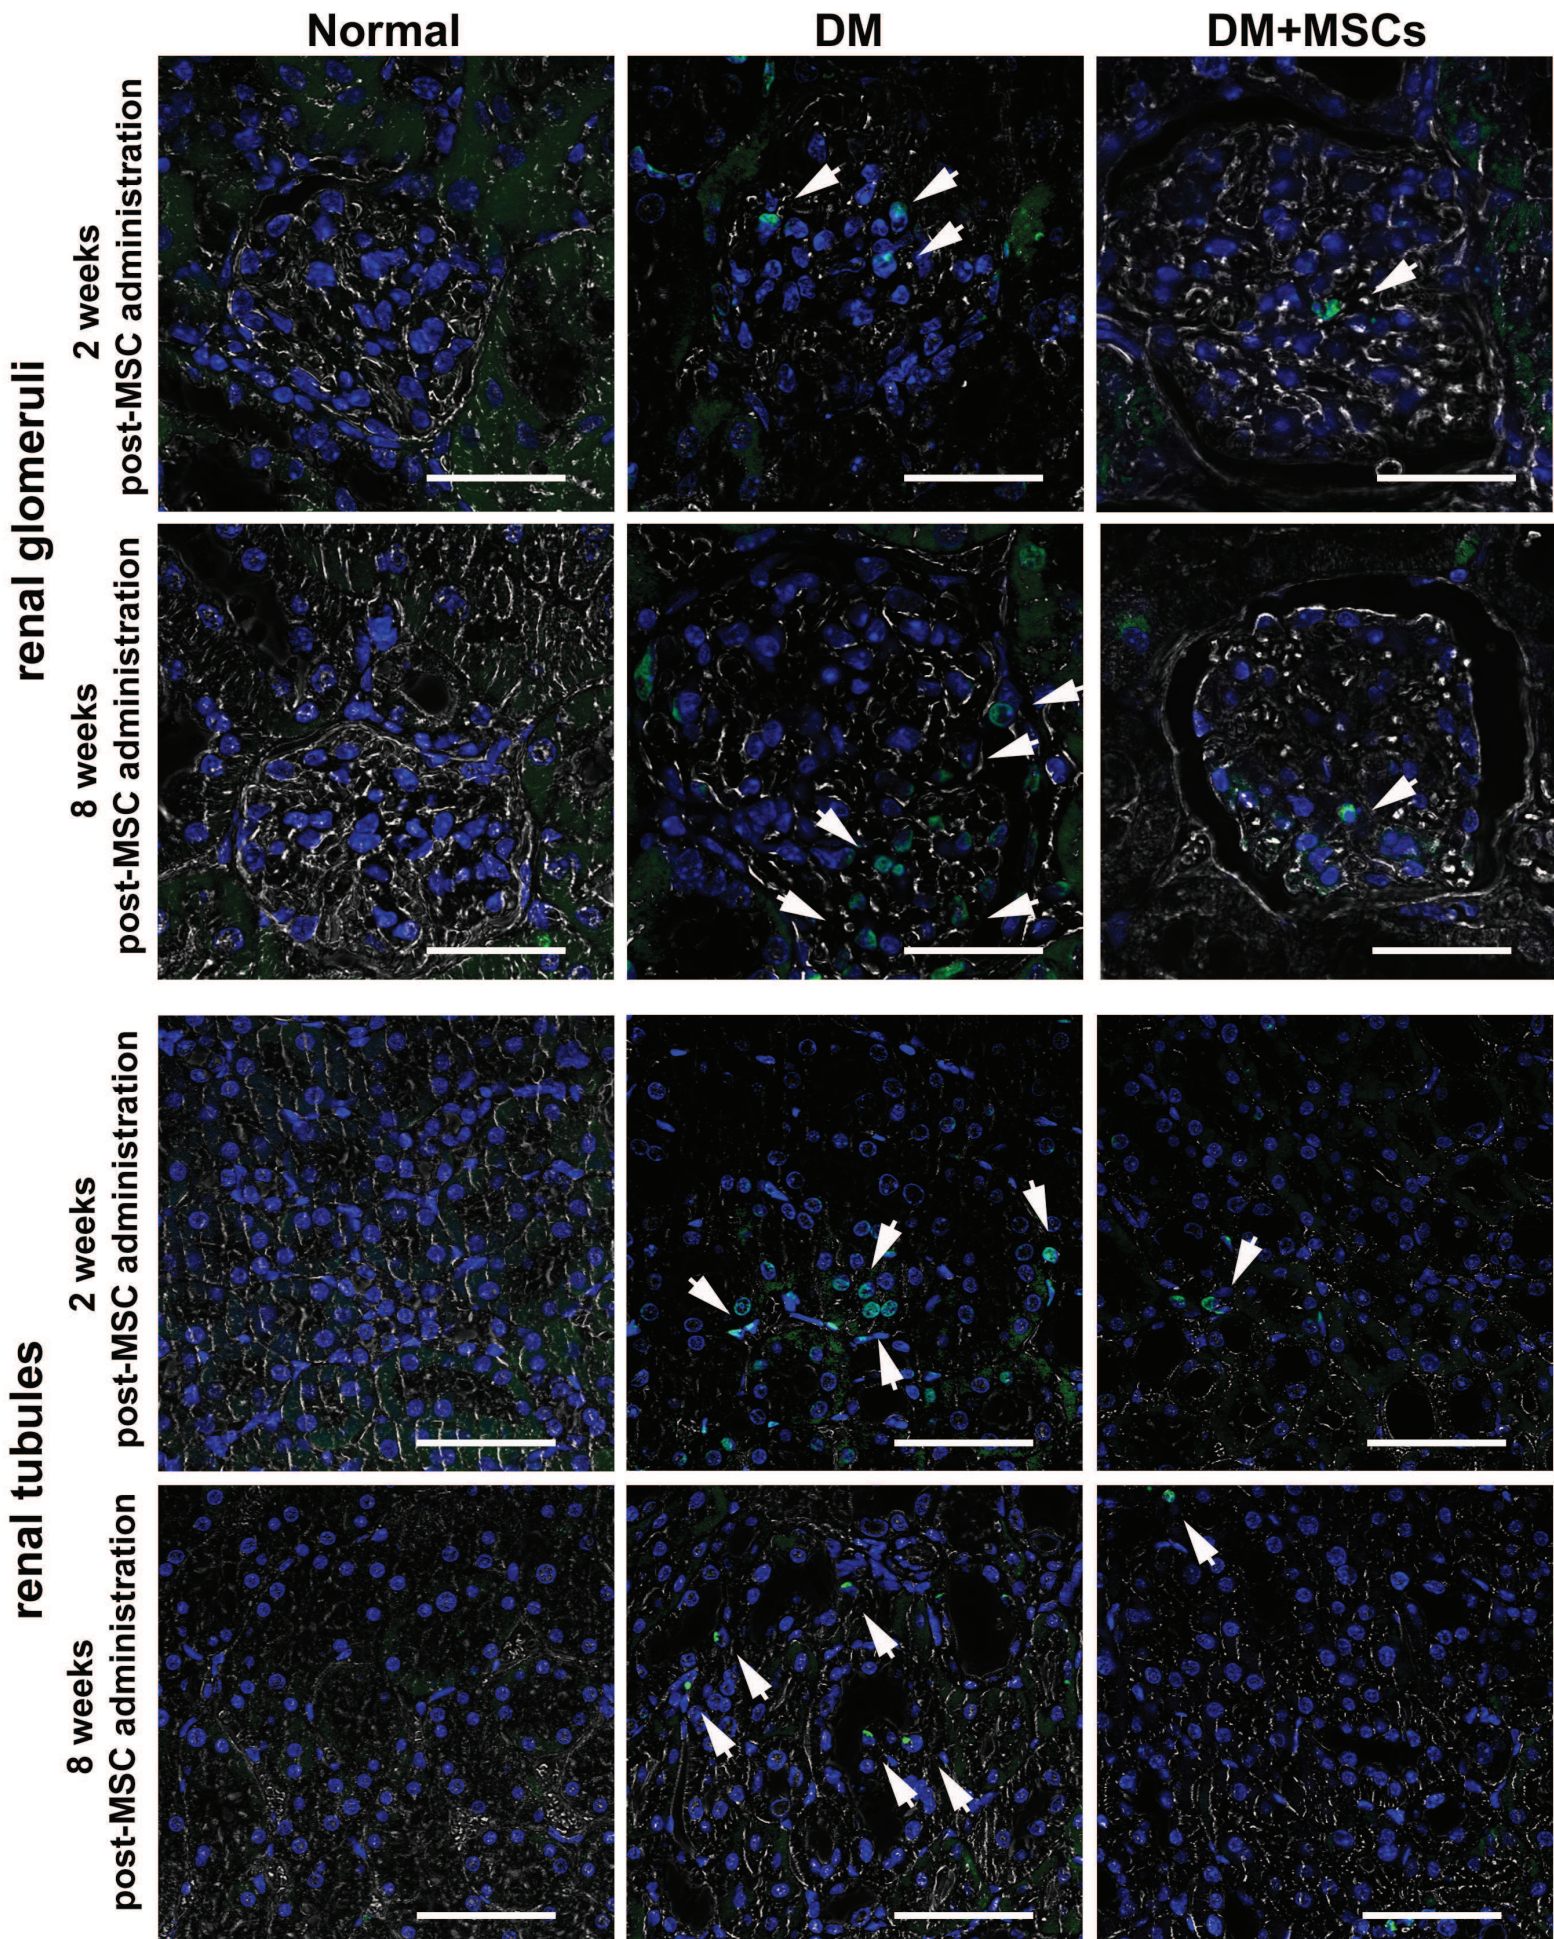

Supplement: f1 [file 164703.f1.pdf]
